# Supplementary material for: Genome Annotation of Poly(lactic acid) Degrading Pseudomonas aeruginosa, Sphingobacterium sp. and Geobacillus sp
Source: MDPI journal article supplement (doi:10.3390/ijms22147385), 2021-07-10
Supplement: s1 [file s1]

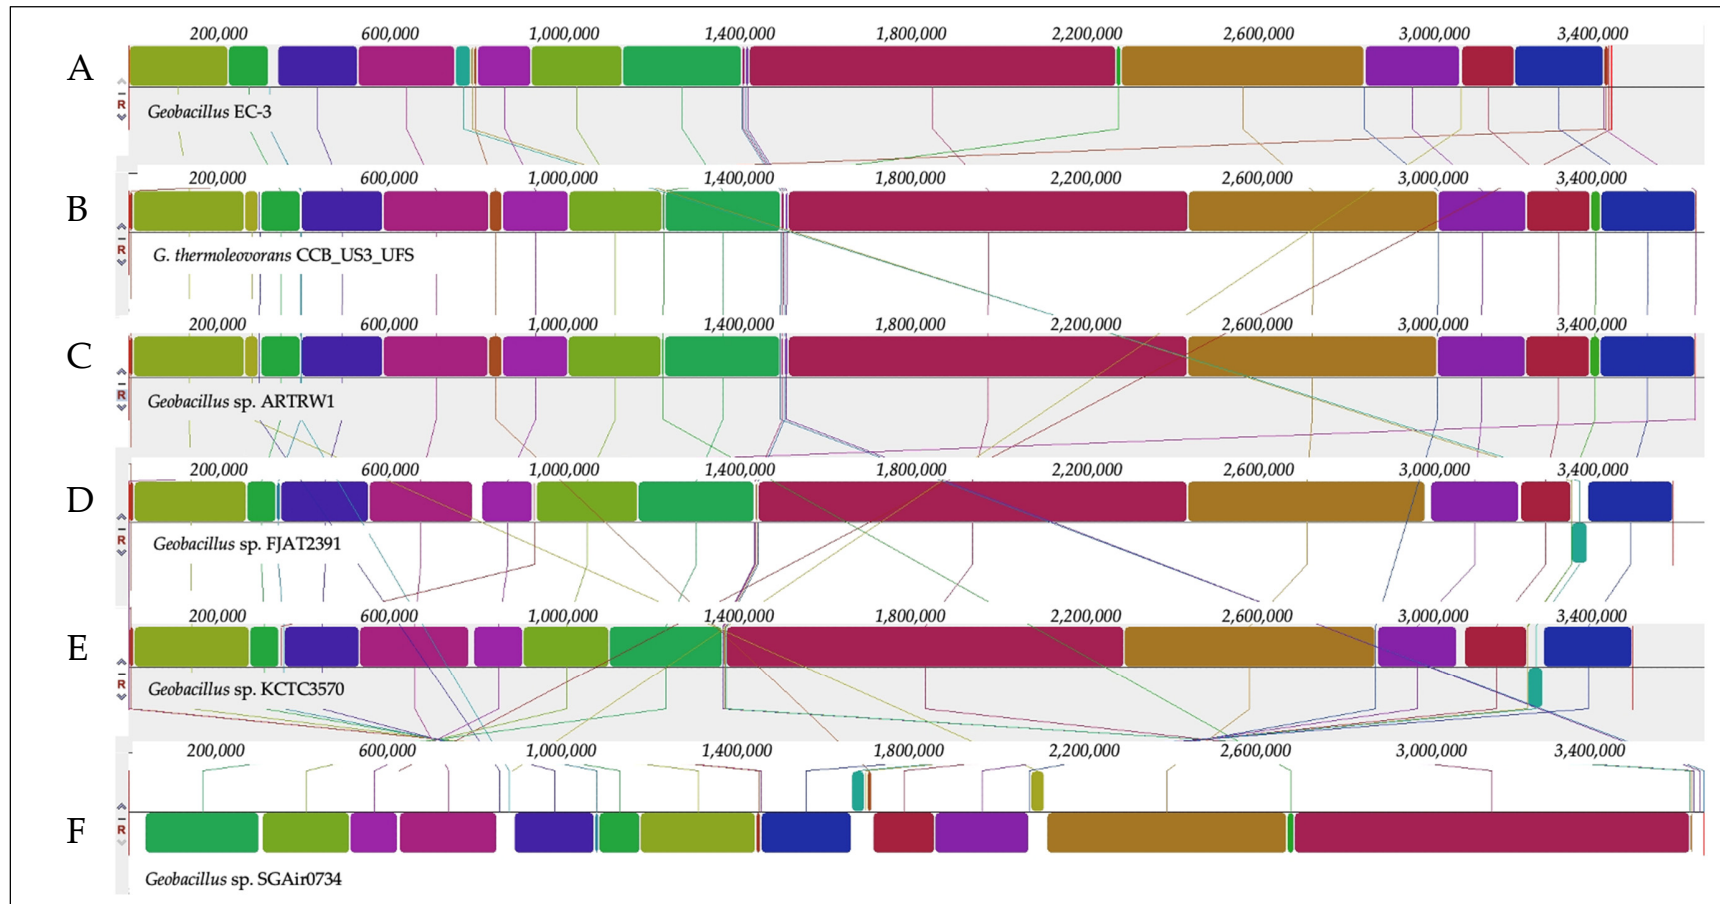

**Figure S1.** MAUVE alignment of six *Geobacillus* genomes. A, *Geobacillus* EC-3 (Genbank PRJNA721072); B, *G. thermoleovorans* CCB\_US3\_UFS (Genbank NC\_016593); C, *G. thermoleovorans* ARTRW1 (Genbank NZ\_CP042251); D, *Geobacillus* FJAT-2391 (Genbank CP017071); E, *G. thermoleovorans* KCTC 3570 (Genbank CP014335); F, *G. thermoleovorans* SGAir0734 (Genbank NZ\_CP027303).
